# Supplementary material
Source: Springer Nature journal article supplement (https://www.springermedizin.de/resource/supplementary/12865_2009_267_MOESM4_ESM.pdf/9427636)

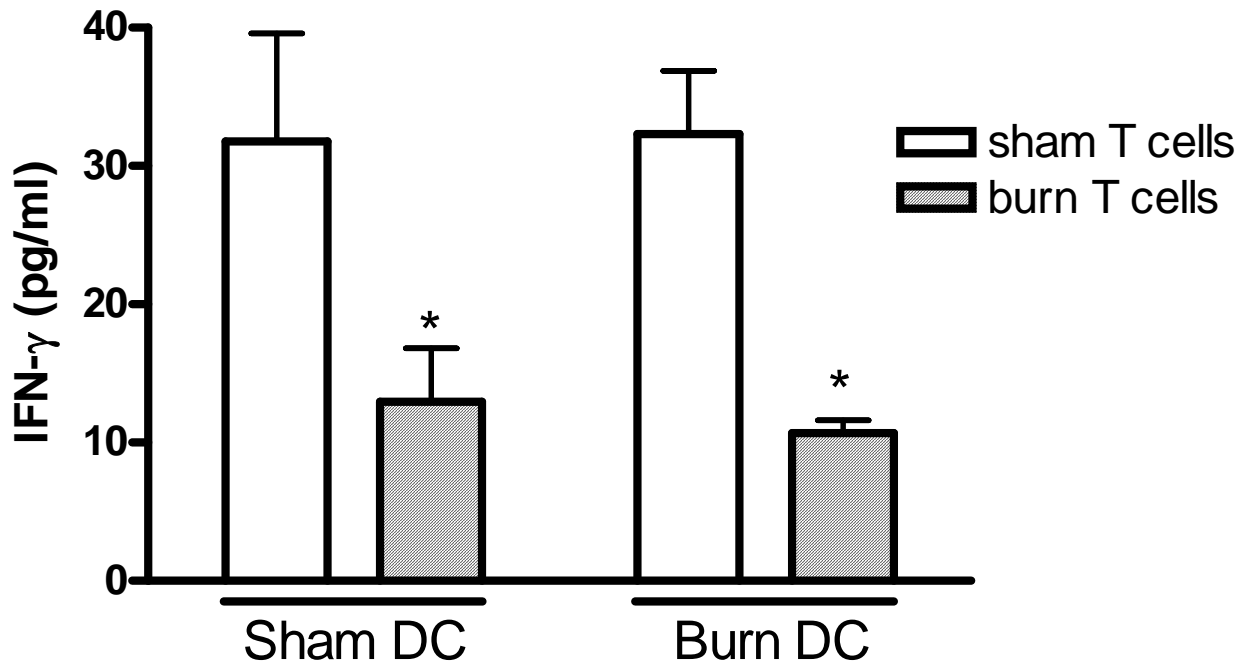

Supplement: MOESM4 [file 9427636]
